# Supplementary material for: Clinical Biochemical Indicators and Intestinal Microbiota Testing Reveal the Influence of Reproductive Age Extending from the Mother to the Offspring
Source: PubMed Central journal article supplement (PMC9602618; doi:10.1128/spectrum.01076-22), 2022-08-22
Supplement: spectrum.01076-22-s0001.pdf [file spectrum.01076-22-s0001.pdf]

| Category                         | Variables                                             | 20-25 years (N=17)       | 25-30 years (N=33) | 30-35 years (N=36) | ≥ 35 years (N=48) |
|----------------------------------|-------------------------------------------------------|--------------------------|--------------------|--------------------|-------------------|
| General information              | Ethnic Han (%)                                        | 100                      | 100                | 100                | 100               |
|                                  | Living area (Wenzhou, China) (%)                      | 100                      | 100                | 100                | 100               |
|                                  | Caesarean section (%)                                 | 100                      | 100                | 100                | 100               |
|                                  | Age (year)                                            | * 22.41±1.50             | 27.36±1.52         | 32.17±1.30         | 37.92±2.59        |
|                                  | Gestational weeks (week)                              | 38.89±1.27               | 38.75±1.06         | 38.94±1.00         | 38.83±0.88        |
|                                  | Harmonious marital status (%)                         | 100                      | 100                | 100                | 100               |
|                                  | Toxic exposure history (%)                            | 0                        | 0                  | 0                  | 0                 |
|                                  | Radioactive material exposure history (%)             | 0                        | 0                  | 0                  | 0                 |
|                                  | Gravida (times)                                       | * 1.65±0.79              | 1.97±1.01          | 2.86±1.48          | 4.02±1.66         |
|                                  | Pregnancy (times)                                     | * 1.35±0.61              | 1.48±0.51          | 2.06±0.71          | 2.02±0.56         |
|                                  | History of abortion (times)                           | * 0.29±0.47              | 0.48±0.71          | 0.83±1.03          | 2.02±1.52         |
|                                  | History of preterm birth (times)                      | 0                        | 0                  | 0.03±0.17          | 0                 |
|                                  | Family history of type 2 diabetes mellitus (%)        | 0                        | 0                  | 0                  | 2.08              |
|                                  | History of other diseases (%)                         | 0                        | 0                  | 0                  | 0                 |
| Physical Examination Information | Body mass index (kg/m <sup>2</sup> )                  | * 26.98±4.13             | 25.53±2.96         | 27.11±3.08         | 27.71±3.38        |
|                                  | Blood type O (%)                                      | 17.65                    | 40.63              | 36.11              | 33.33             |
|                                  | Body temperature (°C)                                 | 36.86±0.23               | 36.81±0.24         | 36.73±0.52         | 36.80±0.21        |
|                                  | Pulse (times/min)                                     | 90.24±12.53              | 86.85±9.55         | 88.94±7.53         | 86.33±9.29        |
|                                  | Fetal heart rate (times/min)                          | 140.94±7.21              | 141.48±3.44        | 142.83±3.47        | 143.10±3.57       |
|                                  | Systolic blood pressure (mmHg)                        | 114.94±9.32              | 113.91±8.17        | 111.72±11.67       | 113.25±10.80      |
|                                  | Diastolic blood pressure (mmHg)                       | 73.94±7.91               | 73.55±6.10         | 75.94±7.26         | 74.73±8.01        |
|                                  | Fundus high (cm)                                      | 35.59±2.12               | 34.12±2.65         | 34.78±2.00         | 34.73±2.17        |
|                                  | Interspinous diameter of anterior superior iliac (cm) | 23.59±0.51               | 23.91±0.63         | 23.56±0.56         | 23.83±0.75        |
|                                  | Diameter between iliac crest (cm)                     | 26±0                     | 25.88±1.98         | 26±0.24            | 26.17±0.75        |
|                                  | The sacral disgrace outside diameter (cm)             | 18.88±0.49               | 19±0               | 18.94±0.23         | 18.93±0.29        |
|                                  | Intertubercular diameter of ischium (cm)              | 9.03±0.12                | 9±0                | 8.96±0.18          | 8.98±0.21         |
|                                  | Abdomen circumference (cm)                            | 98.47±7.37               | 98.15±6.67         | 100.26±6.49        | 100.63±6.09       |
|                                  | Medications                                           | Probiotic supplement (%) | 0                  | 0                  | 0                 |
| Pharmacohistory (%)              |                                                       | 0                        | 0                  | 0                  | 0                 |
| History of drug allergy (%)      |                                                       | 0                        | 0                  | 2.777777778        | 0                 |
| Dietary habits                   | Food allergies (%)                                    | 0                        | 0                  | 0                  | 0                 |
|                                  | Smoking (%)                                           | 0                        | 0                  | 0                  | 0                 |
|                                  | Drinking alcohol (%)                                  | 0                        | 0                  | 0                  | 0                 |
| Newborn Physical Examination     | Previous female fetuses (%)                           | 40                       | 62.5               | 58.62              | 57.14             |
|                                  | Previous fetus weight (g)                             | 3115.9±579.41            | 3173.44±555.69     | 3318.45±421.49     | 3319.74±452.25    |
|                                  | Female fetuses (%)                                    | 41.18                    | 36.36              | 47.22              | 43.75             |
|                                  | Fetal body length (cm)                                | * 50.24±0.83             | 49.91±0.58         | 49.96±0.64         | 50.31±0.75        |
|                                  | Fetus weight (g)                                      | 3527.06±451.67           | 3361.67±451.96     | 3376.53±412.03     | 3526.98±480.35    |
|                                  | Apgar Score                                           | 9.94±0.24                | 9.82±0.64          | 9.97±0.17          | 9.96±0.20         |

**Supplemental Table S1. General clinical information of participants.** \* denotes FDR < 0.05.

| Category                       | Variables                                 | 20-25 years (N=17) | 25-30 years (N=33) | 30-35 years (N=36) | ≥35 years (N=48) |
|--------------------------------|-------------------------------------------|--------------------|--------------------|--------------------|------------------|
| Thyroid related indicators     | All T4 (ng/ml)                            | 81.51±21.42        | 92.63±17.17        | 87.72±13.20        | 87.09±17.98      |
|                                | Free T3 (pmol/L)                          | 4.64±0.69          | 4.67±0.58          | 4.42±0.58          | 4.36±0.67        |
|                                | Free T4 (pmol/L)                          | 10.6±2.09          | 11.43±3.52         | 9.97±2.70          | 10.42±2.83       |
|                                | Thyroid stimulating hormone (mIU/L)       | 2.82±2.05          | 2.83±1.38          | 2.06±0.99          | 2.21±1.22        |
|                                | Thyroid peroxidase antibody (IU/ml)       | 5.84±5.19          | 14.04±14.49        | 16.50±26.99        | 11.41±14.91      |
| Coagulation related indicators | Prothrombin time (s)                      | 11.12±0.39         | 11.07±0.44         | 11.21±0.51         | 11.16±0.59       |
|                                | International normalized ratio            | 0.94±0.03          | 0.94±0.04          | 0.95±0.04          | 0.95±0.05        |
|                                | Activated partial thromboplastin time (s) | 27.26±1.71         | 27.94±1.64         | 27.61±1.94         | 27.78±2.11       |
|                                | Thrombin time (s)                         | 14.06±1.01         | 13.55±1.07         | 13.40±0.88         | 13.50±0.81       |
|                                | Fibrinogen (g/L)                          | 4.21±0.58          | 4.35±0.52          | 4.33±0.53          | 4.33±0.44        |
|                                | D-dimer (mg/L)                            | 1.99±1.00          | 2.29±1.42          | 1.84±1.32          | 1.96±1.21        |
|                                | Degradation products of fibrin (mg/L)     | 5.32±2.35          | 5.44±3.03          | 4.40±2.92          | 4.85±2.80        |
| Urine routines                 | Clear transparency (%)                    | 92.31              | 90                 | 96.67              | 92.86            |
|                                | Protein negative (%)                      | 100                | 73.33              | 76.67              | 69.05            |
|                                | Glucose negative (%)                      | 92.31              | 83.33              | 96.67              | 95.24            |
|                                | Ketone negative (%)                       | 100                | 86.67              | 93.33              | 78.57            |
|                                | Bilirubin negative (%)                    | 100                | 100                | 100                | 100              |
|                                | Urobilinogen negative (%)                 | 100                | 96.67              | 96.67              | 95.24            |
|                                | Occult blood negative (%)                 | 92.31              | 83.33              | 90                 | 78.57            |
|                                | Leucocyte negative (%)                    | 69.23              | 50                 | 46.67              | 59.52            |
|                                | Nitrite (%)                               | 100                | 100                | 100                | 97.62            |
|                                | Vitamin C (%)                             | 53.85              | 80                 | 73.33              | 73.81            |
|                                | Sperm (%)                                 | 100                | 100                | 100                | 100              |
|                                | RBCl (%)                                  | 100                | 100                | 100                | 100              |
|                                | Tube (%)                                  | 100                | 93.33              | 96.67              | 97.62            |
|                                | The pathological type tube (%)            | 100                | 100                | 96.67              | 97.62            |
|                                | Density                                   | 1.02±0.01          | 1.02±0.01          | 1.02±0.01          | 1.02±0.01        |
|                                | Pondus hydrogenii value                   | 6.58±0.53          | 6.6±0.56           | 6.56±0.74          | 6.39±0.51        |
|                                | Red blood cell (%)                        | 7.77±13.97         | 137.83±729.66      | 5.33±4.87          | 11.43±35.14      |
|                                | White blood cell count (%)                | 36.62±104.61       | 33.83±99.11        | 43.33±122.61       | 17.07±32.15      |
|                                | Epithelial cell count (%)                 | 21.85±19.65        | 43.5±65.15         | 52.83±49.60        | 37±61.84         |
|                                | Small round epithelial cell (%)           | 0.77±1.01          | 0.77±1.19          | 1.03±1.19          | 1.07±1.69        |
| Viscose silk (%)               | 23.85±34.92                               | 29.8±39.83         | 38.97±60.81        | 51.14±81.84        |                  |
| Fungus (%)                     | 0±0                                       | 0±0                | 0.2±1.10           | 0.05±0.31          |                  |
| Crystal (%)                    | 18.69±28.67                               | 6±17.99            | 26.13±64.00        | 10.21±34.06        |                  |

**Supplemental Table S2. Thyroid related indicators, and coagulation-related indicators and urine routine indicators information of participants in different age groups.**

| ID                          | Genus                         | R       | NULL P value |
|-----------------------------|-------------------------------|---------|--------------|
| Absolute value of monocytes | <i>Corynebacterium</i>        | -0.258  | 0.0106       |
|                             | <i>Facklamia</i>              | 0.189   | 0.0354       |
|                             | <i>Peptococcus</i>            | -0.1999 | 0.0382       |
|                             | <i>Bulleidia</i>              | -0.1918 | 0.0449       |
| Absolute neutrophil count   | <i>Corynebacterium</i>        | -0.2347 | 0.0183       |
|                             | <i>Facklamia</i>              | 0.2045  | 0.0257       |
|                             | <i>Enterococcus</i>           | -0.2165 | 0.0272       |
|                             | <i>Methylotenera</i>          | -0.1961 | 0.0413       |
|                             | <i>Dorea</i>                  | 0.1763  | 0.0456       |
|                             | <i>Candidatus Koribacter</i>  | -0.1864 | 0.0498       |
| White blood cell count      | <i>Corynebacterium</i>        | -0.233  | 0.019        |
|                             | <i>Facklamia</i>              | 0.2069  | 0.0244       |
|                             | <i>Enterococcus</i>           | -0.2167 | 0.027        |
|                             | <i>Dorea</i>                  | 0.177   | 0.045        |
|                             | <i>Candidatus Koribacter</i>  | -0.1905 | 0.046        |
| Platelet distribution width | <i>Butyricimonas</i>          | 0.2531  | 0.0083       |
|                             | <i>Rothia</i>                 | 0.2217  | 0.0175       |
|                             | <i>Mogibacterium</i>          | 0.2066  | 0.0245       |
|                             | <i>Candidatus Arthromitus</i> | -0.2161 | 0.0274       |
|                             | <i>Alloiococcus</i>           | 0.201   | 0.0277       |
|                             | <i>Adlercreutzia</i>          | 0.2     | 0.0283       |
|                             | <i>Oscillospira</i>           | 0.1916  | 0.0336       |
|                             | <i>Campylobacter</i>          | 0.1849  | 0.0385       |
|                             | <i>Phascolarctobacterium</i>  | 0.184   | 0.0392       |
|                             | <i>Odoribacter</i>            | 0.182   | 0.0408       |
|                             | <i>Vibrio</i>                 | -0.1936 | 0.0434       |
|                             | <i>Lachnospira</i>            | 0.1756  | 0.0462       |
|                             | <i>Flavobacterium</i>         | -0.189  | 0.0474       |
|                             | <i>Ruminococcus</i>           | 0.1718  | 0.0497       |
| Age                         | <i>Slackia</i>                | 0.2784  | 0.0043       |
|                             | <i>Haemophilus</i>            | 0.2672  | 0.0058       |
|                             | <i>Neisseria</i>              | 0.2438  | 0.0104       |
|                             | <i>Bulleidia</i>              | 0.234   | 0.0132       |
|                             | <i>Anaerostipes</i>           | 0.2036  | 0.0261       |
|                             | <i>Streptomyces</i>           | 0.2031  | 0.0264       |
|                             | <i>Vibrio</i>                 | 0.2025  | 0.0268       |
|                             | <i>Parabacteroides</i>        | 0.1764  | 0.0454       |
|                             | <i>Acinetobacter</i>          | 0.1764  | 0.0455       |
|                             | <i>Candidatus Arthromitus</i> | 0.1763  | 0.0456       |
|                             | <i>Methylotenera</i>          | 0.1724  | 0.0491       |
| Body mass index             | <i>Staphylococcus</i>         | -0.2642 | 0.0091       |
|                             | <i>Sphingobium</i>            | 0.2087  | 0.0234       |
|                             | <i>Faecalibacterium</i>       | 0.189   | 0.0354       |
|                             | <i>Veillonella</i>            | -0.2008 | 0.0376       |
|                             | <i>Propionibacterium</i>      | -0.1906 | 0.0459       |
| Number of gravida           | <i>Alloiococcus</i>           | 0.1743  | 0.0473       |
|                             | <i>Parvimonas</i>             | -0.2074 | 0.0329       |
|                             | <i>cc_115</i>                 | -0.1947 | 0.0424       |
|                             | <i>Pseudonocardia</i>         | 0.1785  | 0.0437       |
| History of abortion         | <i>Granulicatella</i>         | 0.1729  | 0.0487       |
|                             | <i>Pseudonocardia</i>         | 0.2046  | 0.0256       |
|                             | <i>Granulicatella</i>         | 0.2024  | 0.0268       |
| Number of pregnancy         | <i>Mogibacterium</i>          | -0.1897 | 0.0467       |
|                             | <i>cc_115</i>                 | -0.2252 | 0.0225       |
|                             | <i>Acinetobacter</i>          | 0.2101  | 0.0227       |
|                             | <i>Parvimonas</i>             | -0.211  | 0.0305       |
|                             | <i>Escherichia</i>            | -0.2109 | 0.0306       |

**Supplemental Table S3. The associations for each pair of clinical indicator and gut microbe in mothers.**

A

| Group (years) | Mother | Offspring | Paired |
|---------------|--------|-----------|--------|
| 20-25         | 10     | 17        | 10     |
| 25-30         | 33     | 34        | 33     |
| 30-35         | 36     | 35        | 34     |
| ≥35           | 40     | 47        | 39     |

B

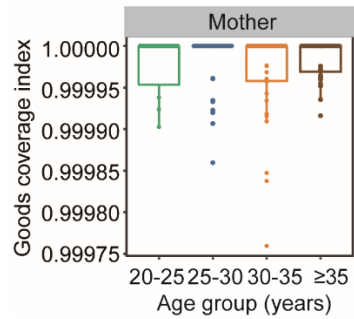

C

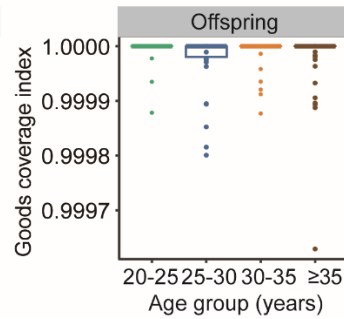

**Supplemental Figure S1. Number of samples and data size of 16S rRNA gene sequencing in this study.** A. Number of feces and meconium samples collected in this study. Among the samples, paired samples refer to the feces of the parturient and the meconium of the newborns delivered by the parturient. B. Goods coverage index of maternal gut microbiota in this study. C. Goods coverage index of newborns meconium in this study.

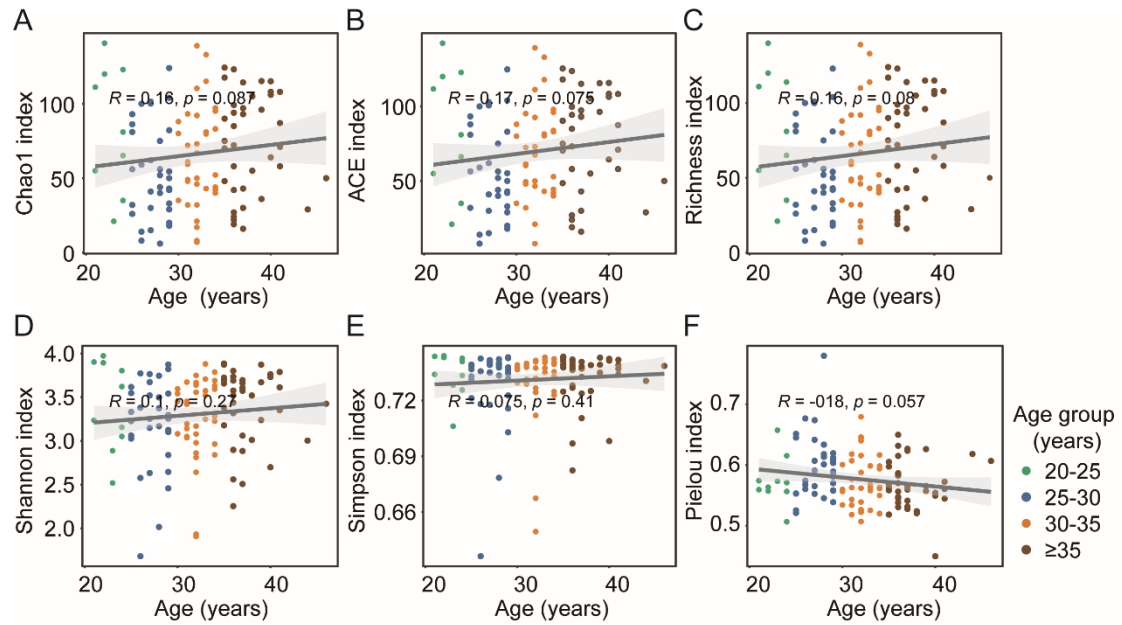

**Supplemental Figure S2. The correlation between age and alpha diversity in maternal gut microbiota.** A. Correlation of Chao1 index with age. B. Correlation of ACE index with age. C. Correlation of richness index with age. D. Correlation of Shannon index with age. E. Correlation of Simpson index with age. F. Correlation of Pielou index with age. Correlation was calculated by Spearman method.

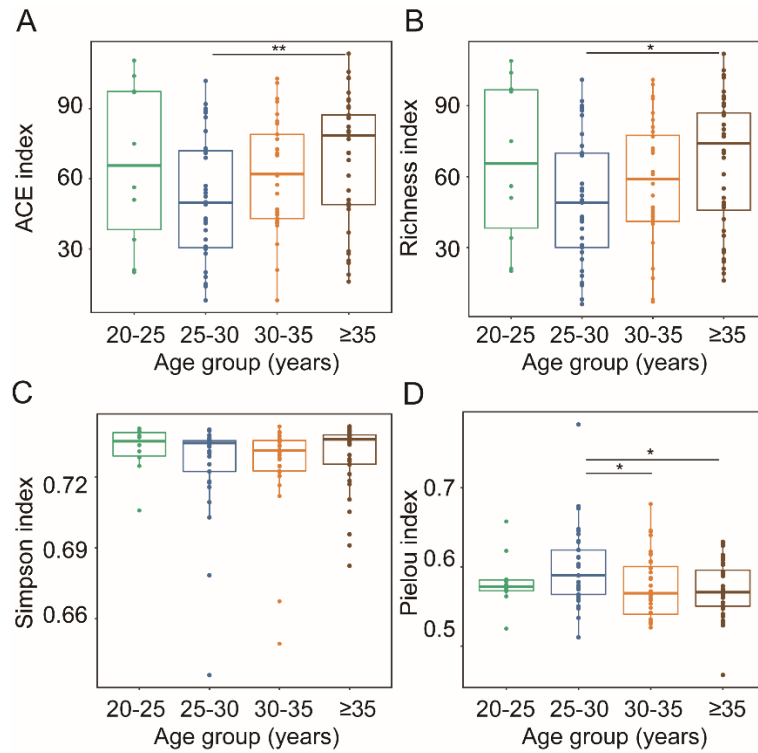

**Supplemental Figure S3. Comparison of  $\alpha$ -diversity among different age groups in maternal gut microbiota.** A. Correlation of ACE index with age. B. Correlation of richness index with age. C. Correlation of Simpson index with age. D. Correlation of Pielou index with age. \* denotes  $P < 0.05$ ; \*\* denotes  $P < 0.01$ .

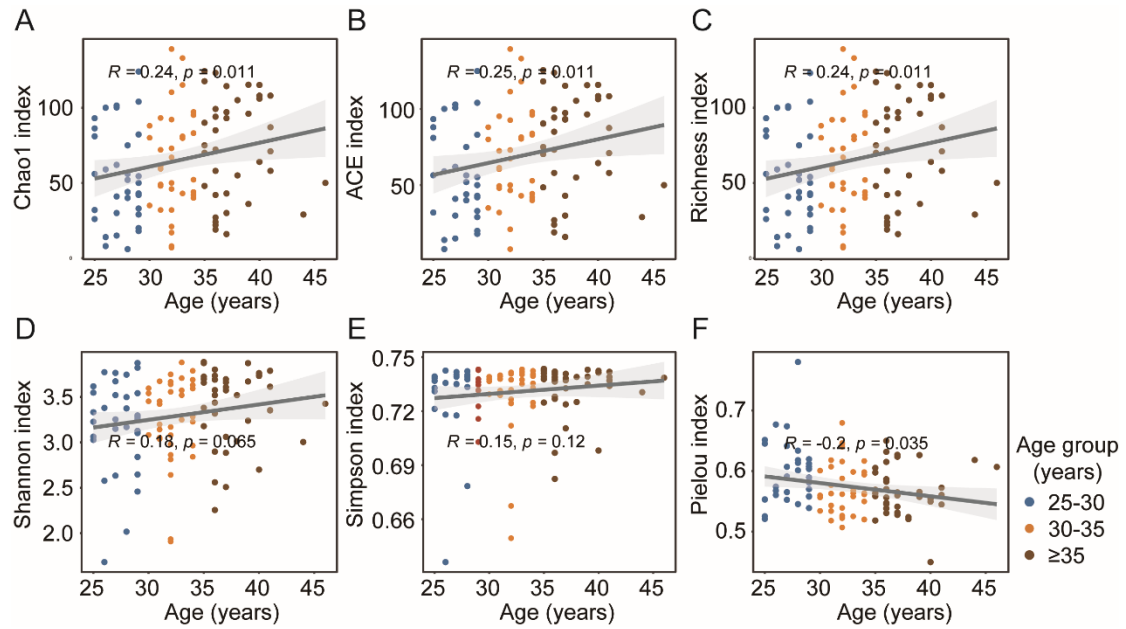

**Supplemental Figure S4. The correlation between age and alpha diversity in maternal microbiota.** A. Correlation of Chao1 index with age. B. Correlation of ACE index with age. C. Correlation of richness index with age. D. Correlation of Shannon index with age. E. Correlation of Simpson index with age. F. Correlation of Pielou index with age. Correlation was calculated by Spearman method.

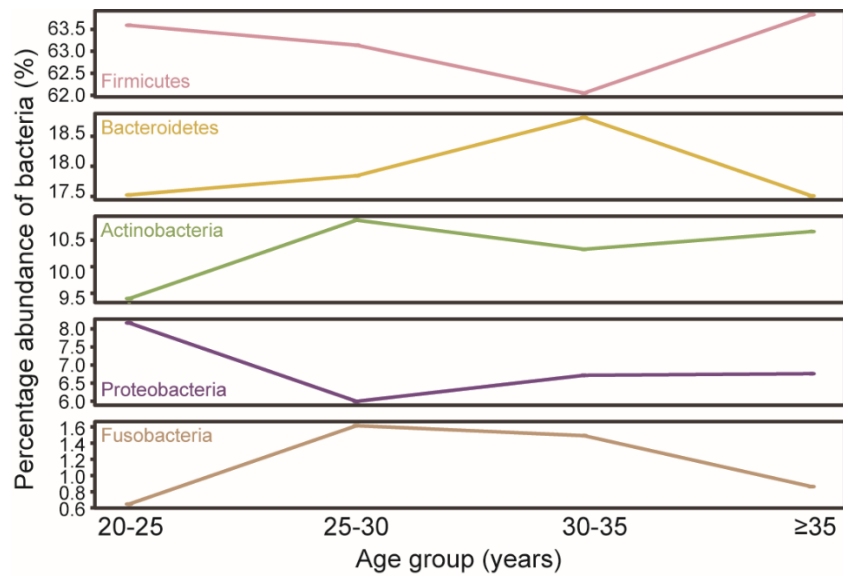

**Supplemental Figure S5. The top 5 most abundant phyla in maternal microbiota of different age groups.**



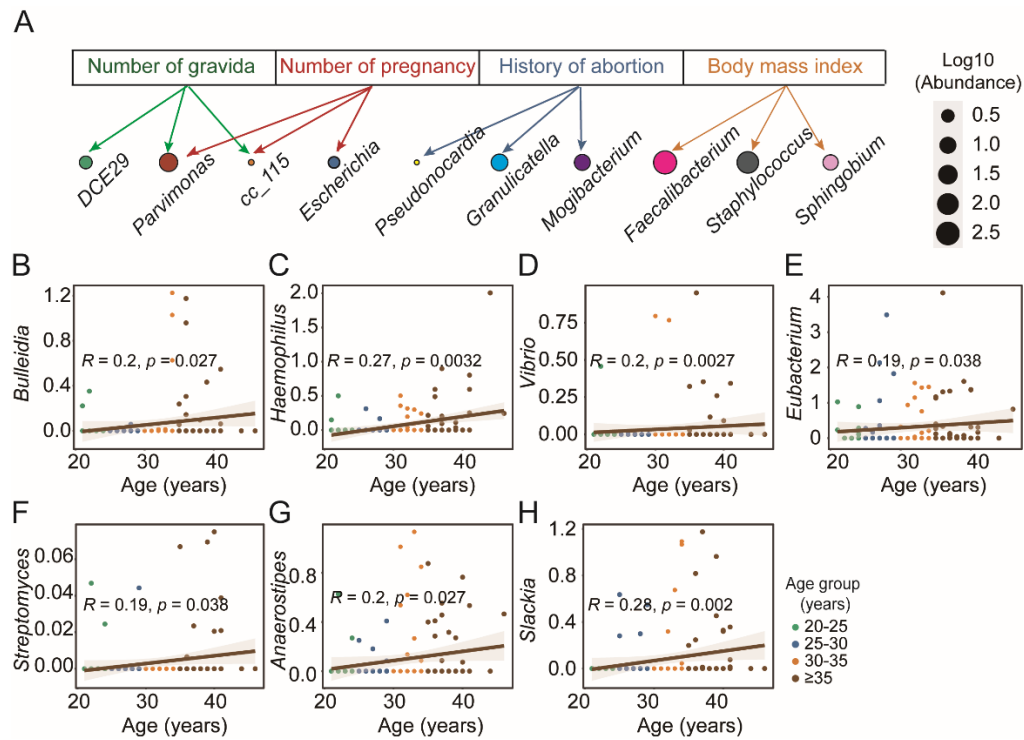

**Supplemental Figure S6. The correlation between general clinical data and bacteria at the genus level in maternal gut microbiota.** A. Bacteria that are significantly associated with general clinical data with significant differences in age groups, the circle size represents the log10 (average abundance) of the bacteria. B. Correlation of *Bulleidia* with age. C. Correlation of *Haemophilus* with age. D. Correlation of *Vibrio* with age. E. Correlation of *Eubacterium* with age. F. Correlation of *Streptomyces* with age. G. Correlation of *Anaerostipes* with age. H. Correlation of *Slackia* with age. The correlation was calculated by Spearman method.

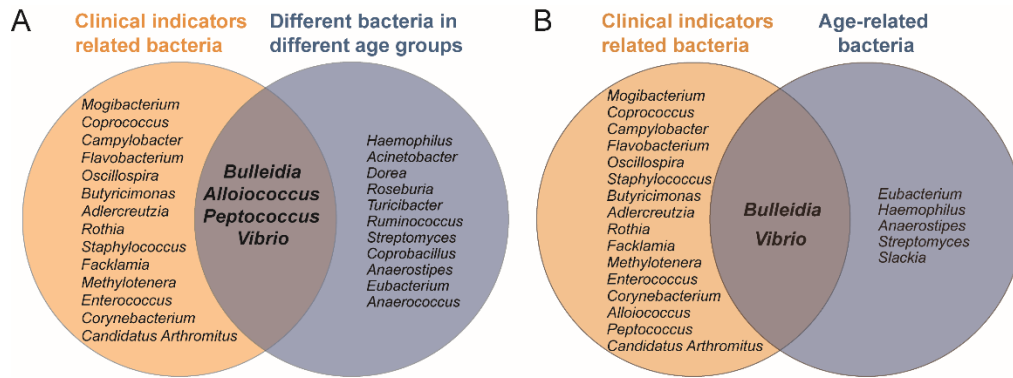

**Supplemental Figure S7. All bacteria that have significant different with both clinical indicators and age in the mother. A. All bacteria that have significant correlation with clinical indicators and have significant different in different age groups. B. All bacteria that have significant correlation with clinical indicators and age.**

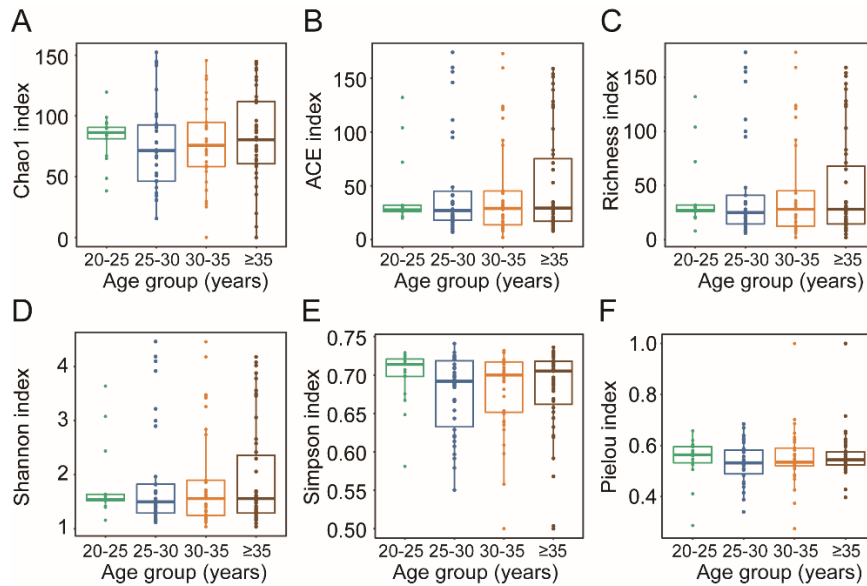

**Supplemental Figure S8. Comparison of  $\alpha$  diversity among different age groups in neonatal meconium.** A. Comparison of Chao1 index in different age groups. B. Comparison of ACE index in different age groups. C. Comparison of richness index in different age groups. D. Comparison of Shannon index in different age groups. E. Comparison of Simpson index in different age groups. F. Comparison of Pielou index in different age groups.

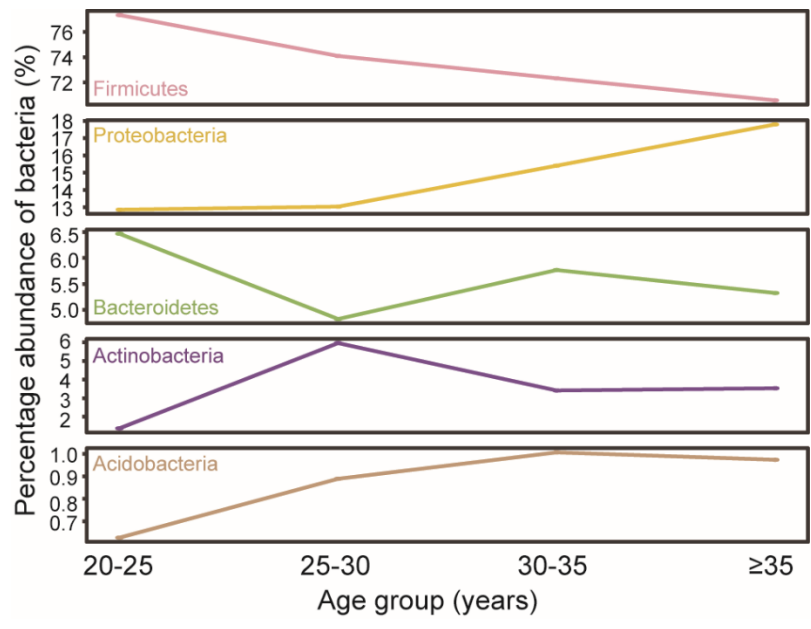

**Supplemental Figure S9. The top 5 most abundant bacterial phyla in newborn microbiota in different age groups.**

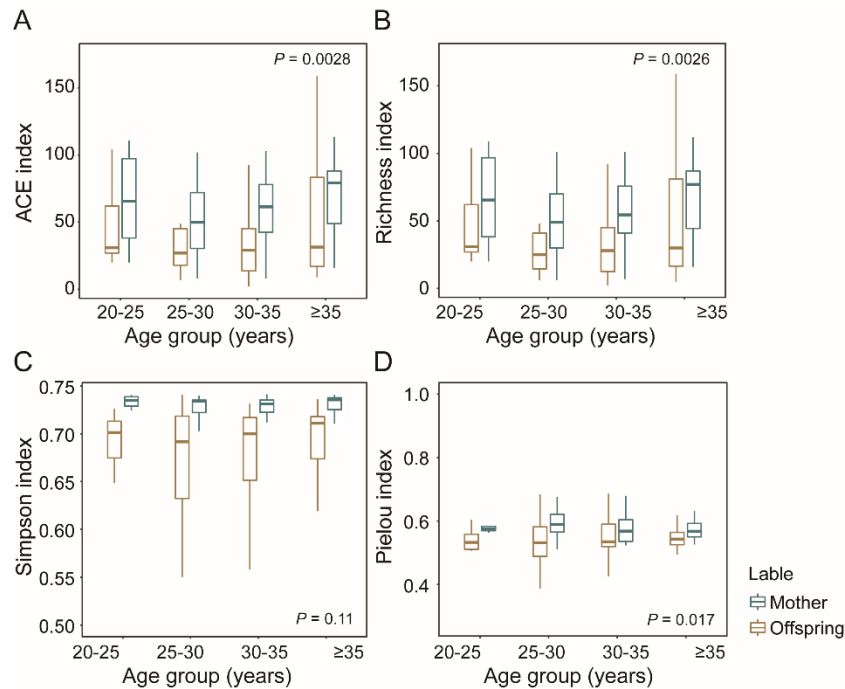

**Supplemental Figure S10. Comparison of  $\alpha$ -diversity of bacterial communities among different age groups in paired maternal feces and neonatal meconium samples.** A. Comparison of ACE index of bacterial communities among different age groups in paired maternal feces and neonatal meconium samples. B. Comparison of Richness index of bacterial communities among different age groups in paired maternal feces and neonatal meconium samples. C. Comparison of Simpson index of bacterial communities among different age groups in paired maternal feces and neonatal meconium samples. D. Comparison of Pielou index of bacterial communities among different age groups in paired maternal feces and neonatal meconium samples.

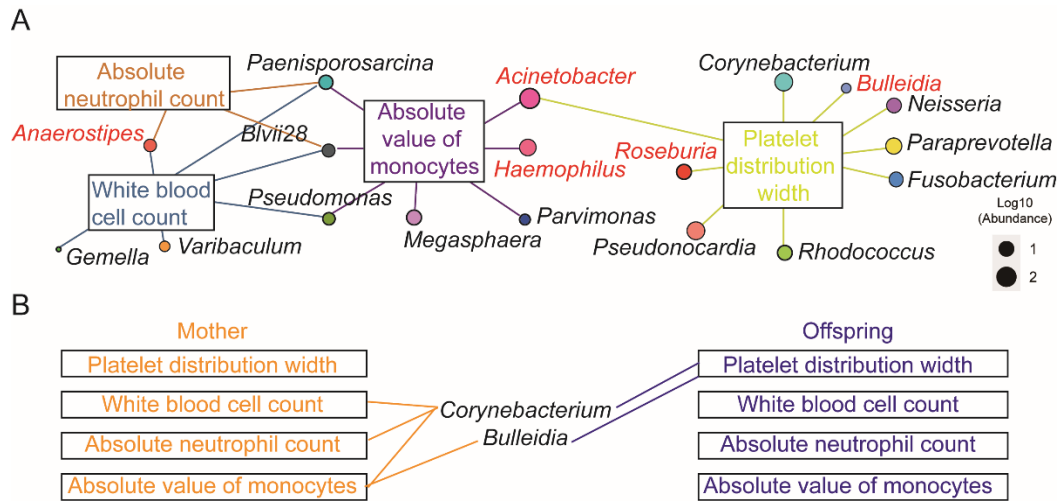

**Supplemental Figure S11. The clinical physiological and biochemical indices related to intestinal microbes of newborns.** A. All bacteria that have significant correlation with clinical test indicators, total protein, creatinine, platelet distribution width, white blood cell count, absolute neutrophil count, absolute value of monocytes indicators that are significantly related to age group. Bacteria marked in red text represents bacteria with significant differences in maternal microbiota among different age groups. B. Identical bacteria that have significant correlation with clinical physiological and biochemical indicators in both mother and newborn.
